# Supplementary material for: Synthesis of Li–Mn–O mesocrystals with controlled crystal phases through topotactic transformation of MnCO3
Source: Royal Society of Chemistry journal article supplement (doi:10.1039/c3nr33767g), 2013-01-01
Supplement: c3nr33767g.pdf [file c3nr33767g.pdf]

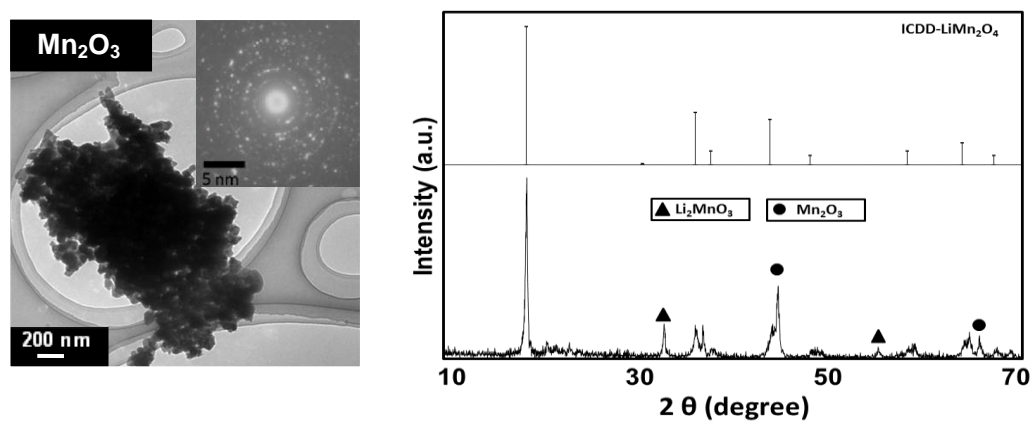

Fig. S1 TEM image and XRD pattern of  $\text{Mn}_2\text{O}_3$  prepared from the  $\text{MnCO}_3$  precursor.

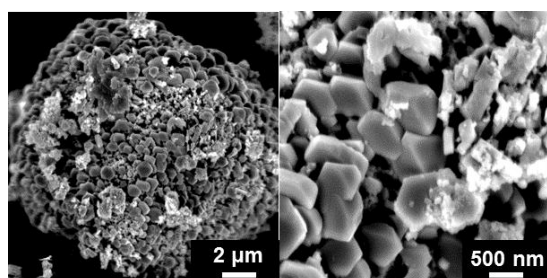

Fig. S2 SEM images of  $\text{LiMn}_2\text{O}_4$  synthesized from the  $\text{Mn}_2\text{O}_3$  precursor.
